# Supplementary material
Source: PubMed Central journal article supplement (PMC2972959)
Supplement: 1010249107_pnas.201010249SI.pdf [file 1010249107_pnas.201010249SI.pdf]

# Supporting Information

Guo et al. 10.1073/pnas.1010249107

## Materials and Methods

**Generation of Mice Lacking *Cdc42* in T Lymphocytes.** Conditional targeted *Cdc42<sup>fllox/flox</sup>* mice were generated as described previously (37). The flox allele contains loxP sites flanking exon 2 of *Cdc42* alleles. To delete *Cdc42* in the T-cell lineage in vivo, *Cdc42<sup>fllox/flox</sup>* mice were mated with mice expressing Cre recombinase under the control of Lck proximal promoter (Jackson Laboratory). All mice used were 4–8 wk of age. All animals were housed under specific pathogen-free conditions in the Animal Facility at Cincinnati Children's Hospital Research Foundation.

**Endogenous *Cdc42* Activity Assay.** Purified splenic T cells were left unstimulated or were stimulated with 80 ng/mL IL-7 or 10  $\mu$ g/mL anti-CD3 plus 2  $\mu$ g/mL anti-CD28 antibodies. Cell-division cycle 42 (*Cdc42*) activity (GTP-bound *Cdc42*) was detected by a previously described pull-down assay using the *Cdc42* effector probe GST-p21-activated kinase 1 (PAK1) that contains the *Cdc42*-interactive domain.

**Activation-Induced Cell Death.** Splenocytes were cultured for 48 h with 20 U/mL IL-2, 1  $\mu$ g/mL plate-bound anti-CD3, and 1  $\mu$ g/mL anti-CD28 antibodies. Live cells were purified by a Ficoll density gradient and restimulated with 10  $\mu$ g/mL plate-bound anti-CD3 antibody for 24 h. Cells then were stained with anti-CD4 and anti-CD8 antibodies followed by Annexin V staining. The percentage of apoptotic cells was analyzed by flow cytometry.

**Adoptive Transfer.** Purified splenic T cells ( $2 \times 10^6$ ) were labeled with carboxyfluorescein diacetate succinimidyl ester (CFSE) (Molecular Probes) and injected i.v. into *Rag2<sup>-/-</sup>* mice (generous gift of Yi Gu, Experimental Hematology, Cincinnati Children's Hospital Medical Center, Cincinnati, OH). Six days later, splenocytes from these mice were isolated and labeled with anti-CD4 and anti-CD8 antibodies. The number of cell divisions was determined by flow cytometry analysis of the CFSE profile in CD4<sup>+</sup> or CD8<sup>+</sup> T cells.

**Memory Cell Proliferation Assay.** *Cdc42<sup>-/-</sup>* and WT mice were injected i.p. with  $2 \times 10^5$  pfu Armstrong-3 strain of lymphocytic choriomeningitis virus (LCMV). The mice were killed 50 d later. Splenocytes were isolated and cultured in vitro with or without 10  $\mu$ g/mL GP61-80 or 2  $\mu$ g/mL GP33-41 epitopic peptide for 48 h and then analyzed for cell growth rate by a Non-Radioactive Cell Proliferation Assay kit (Promega).

**Immunoblotting.** Whole-cell lysates were prepared and separated by 10% SDS-PAGE. Expression or activation (phosphorylation) of MAP kinase-ERK kinase (MEK), c-Raf, ERK, JNK, and *Cdc42* was probed using the corresponding antibodies. Antibodies against total or phosphorylated MEK, c-Raf, ERK, and JNK were from Cell Signaling Technology; anti-*Cdc42* antibody was from Millipore.

**Interaction Between *Cdc42* Point Mutants and *Cdc42* Effectors.** NIH 3T3 cells overexpressing the HA<sub>3</sub>-tagged *Cdc42* mutants were lysed and subjected to the pull-down assay using *Cdc42* effector probes containing the *Cdc42*-interactive domain: GST-PAK1, GST-Wiskott-Aldrich syndrome protein (GST-WASP), GST-IQ motif containing GTPase activating protein 1/2 (GST-IQGAP1), and GST-partitioning-defective protein 6B (PAR6B). The binding activities of GTP-bound *Cdc42* mutants to PAK1, WASP, IQGAP1, and PAR6B were detected by Western blotting with anti-HA antibody (Sigma).

**Generation of Bone Marrow Chimeric Mice.** Low-density bone marrow cells were isolated from WT and *Cdc42<sup>-/-</sup>* mice using Histopaque-1083 (Sigma) and then were transduced with one of a number of vectors: mock; *Cdc42*WT; *Cdc42* mutants *Cdc42*D38A, *Cdc42*D63H, or *Cdc42*I173A/L174A; or constitutive active mutant of PAK1 (caPAK1) that coexpresses GFP by retroviral infection in the presence of retronectin (Takara). GFP<sup>+</sup>-transduced cells were selected by FACS and transplanted into lethally irradiated BoyJ mice. The chimeric mice were killed 8 wk after transplantation, and thymocytes and splenic CD45.2<sup>+</sup> T cells derived from donor bone marrow cells were analyzed.

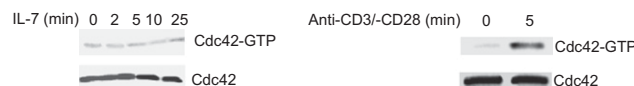

**Fig. S1.** *Cdc42* is not a direct signal transducer of IL-7. Purified splenic T cells from WT mice were stimulated with IL-7 for the indicated time or left unstimulated. As a positive control, splenic T cells from WT mice were stimulated with anti-CD3/CD28 antibodies for 5 min or left unstimulated. The cells were lysed and subject to GST-PAK1 pull-down assay. The amount of *Cdc42*-GTP binding to PAK1 was detected by Western blotting of the coprecipitates with anti-*Cdc42* antibody. Pooled *Cdc42* from total cell lysates also was detected as loading control.



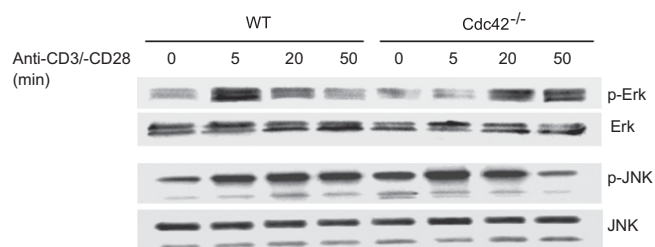

**Fig. S6.** Effects of *Cdc42* deficiency on TCR-triggered ERK and JNK activation. Splenic T cells were purified from *Cdc42*<sup>-/-</sup> and WT mice and stimulated with antibodies against CD3 (10  $\mu$ g/mL) and CD28 (2  $\mu$ g/mL) for the indicated time periods. Cells then were subjected to Western blotting of phosphorylated (p) or total ERK and JNK.

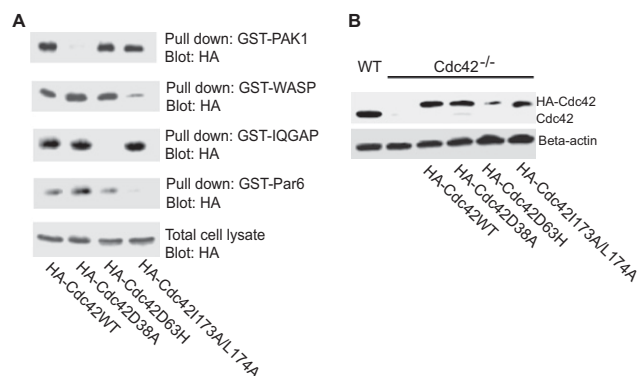

**Fig. S7.** (A) Interaction between Cdc42 mutants and Cdc42 effectors. Cdc42 mutants tagged by HA<sub>3</sub> were transfected into NIH 3T3 cells. The cells were subjected to the pull-down assay using Cdc42 effector probes GST-PAK1, GST-WASP, GST-IQGAP1, and GST-PAR6B. (A) The binding activities of GTP-bound Cdc42 mutants to PAK1, WASP, IQGAP1, and PAR6B were detected by Western blotting with anti-HA antibody. (B) Bone marrow cells from WT and *Cdc42*-deficient mice were isolated and transduced with Cdc42WT and Cdc42 mutants. The transduced bone marrow cells were sorted and transplanted into lethally irradiated BoyJ mice. Recipient mice were killed 2 mo later. Thymocytes were isolated and subjected to Western blotting with anti-Cdc42 antibody. Cdc42WT and Cdc42 mutants tagged with HA<sub>3</sub> ran 2  $K_d$  higher than the endogenous Cdc42 on SDS/PAGE gel.
